# Supplementary material
Source: PubMed Central journal article supplement (PMC2923044)
Supplement: NIHMS217382-supplement-01.pdf [file NIHMS217382-supplement-01.pdf]

Figure S1

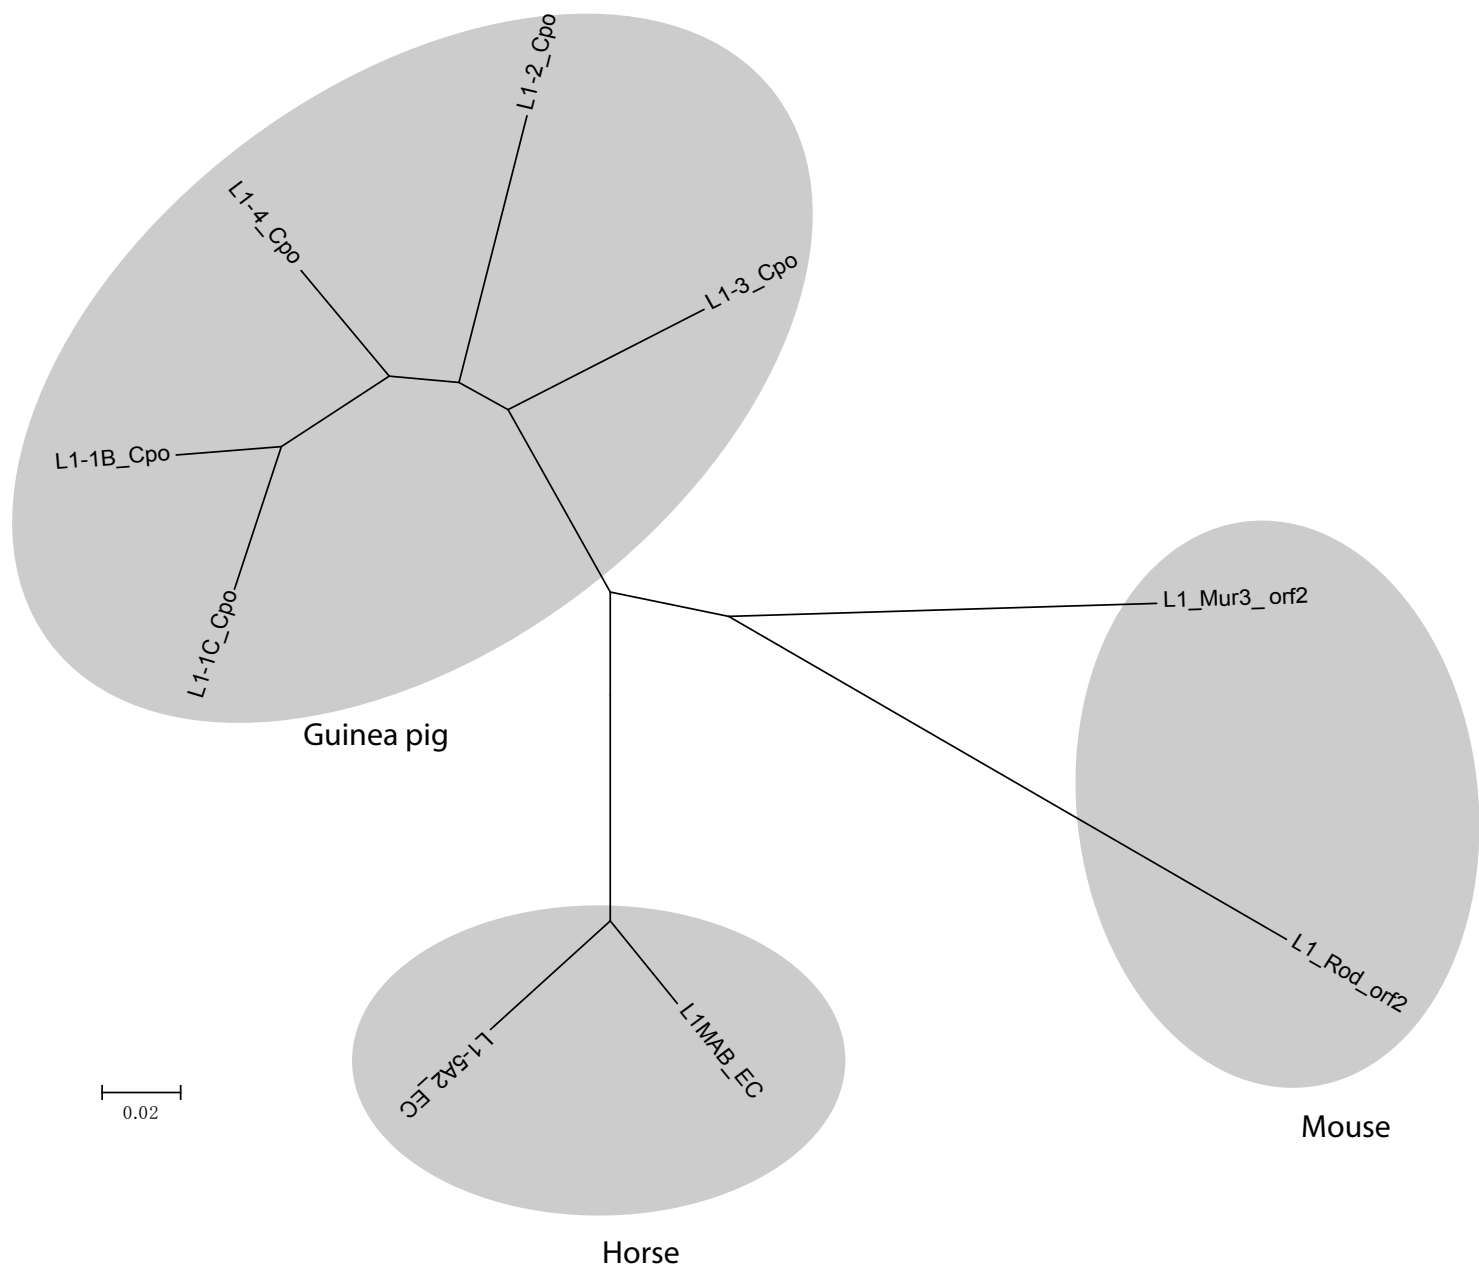

**Figure S1: Phylogenetic tree of the L1 ORF2 sequences.** The tree indicates that L1-3\_Cpo is the oldest L1 in guinea pig (*Cavia porcellus*). The phylogenetic tree is based on ~950 bp sequences (Supplementary File S3), corresponding to the 514-829 amino acid position of human L1 ORF2p (AAD38785), covering most part of the reverse transcriptase domain. These sequences are from Rebase database.
