# Supplementary material
Source: PubMed Central journal article supplement (PMC2923044)
Supplement: NIHMS217382-supplement-02.pdf [file NIHMS217382-supplement-02.pdf]

Figure S2

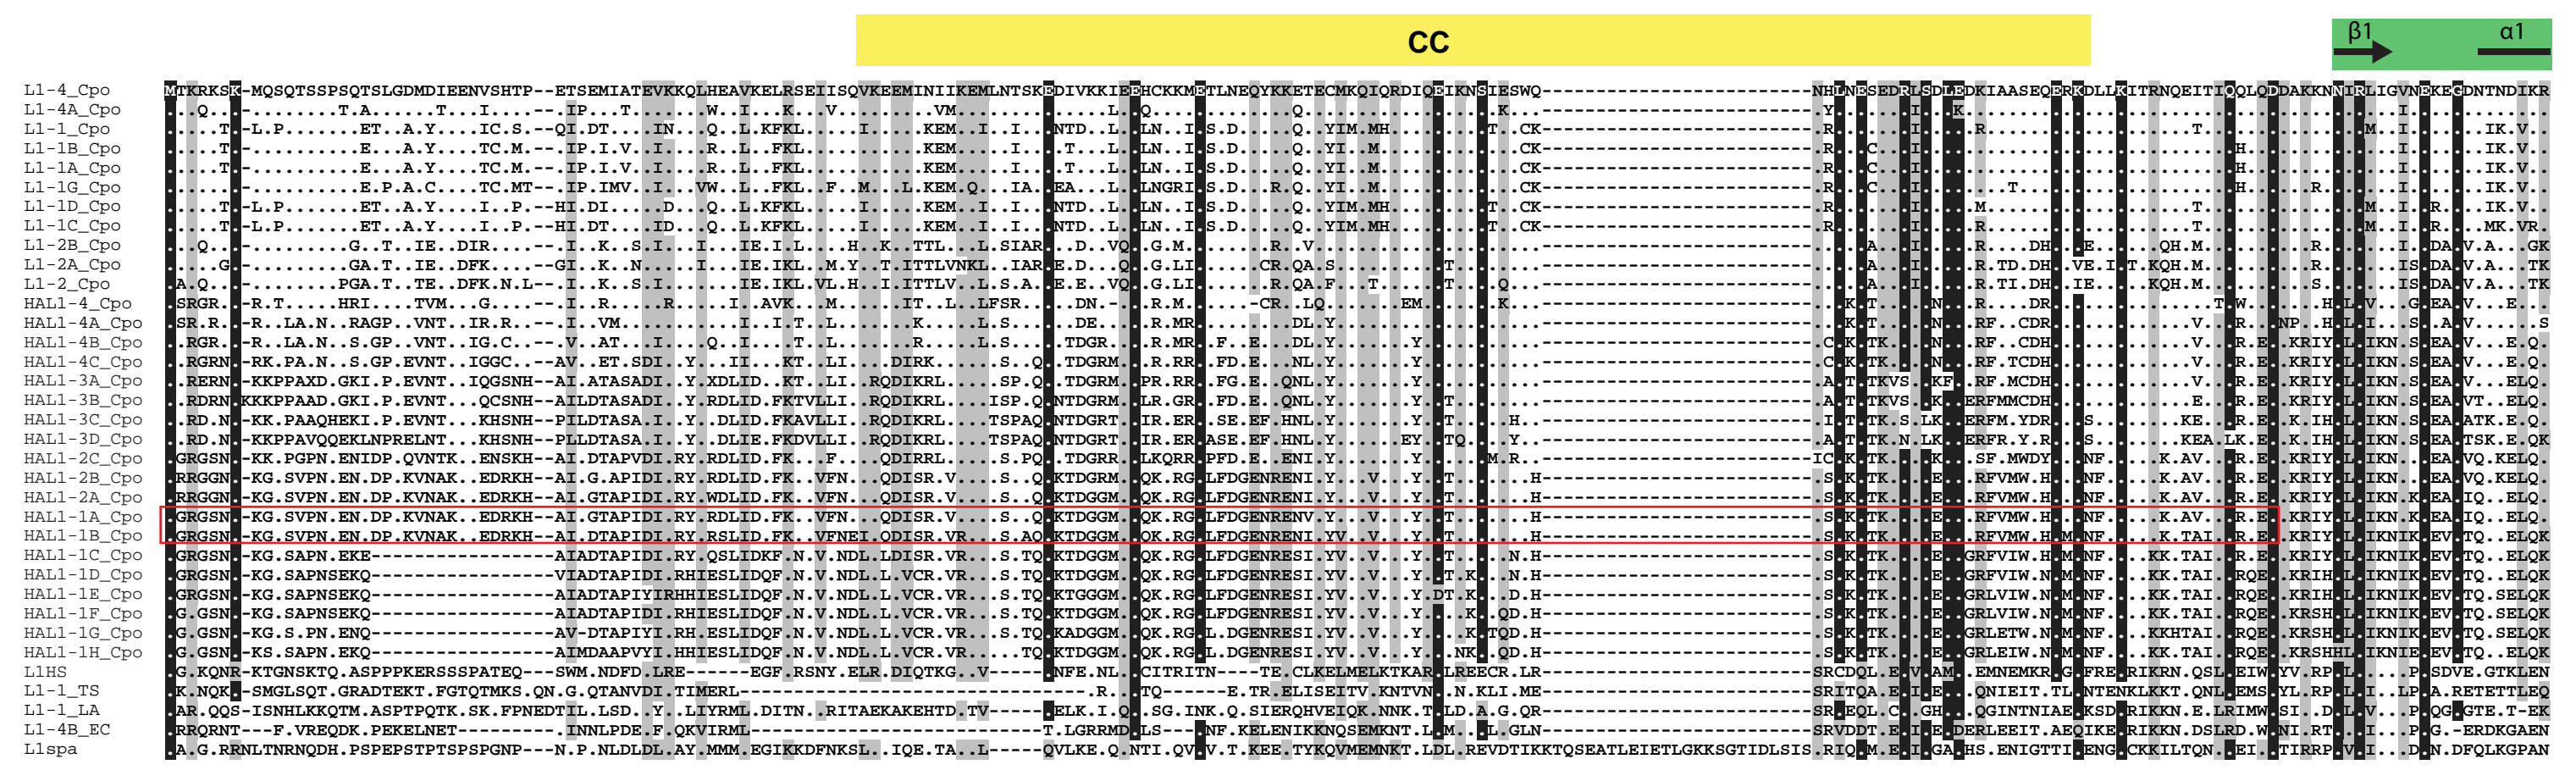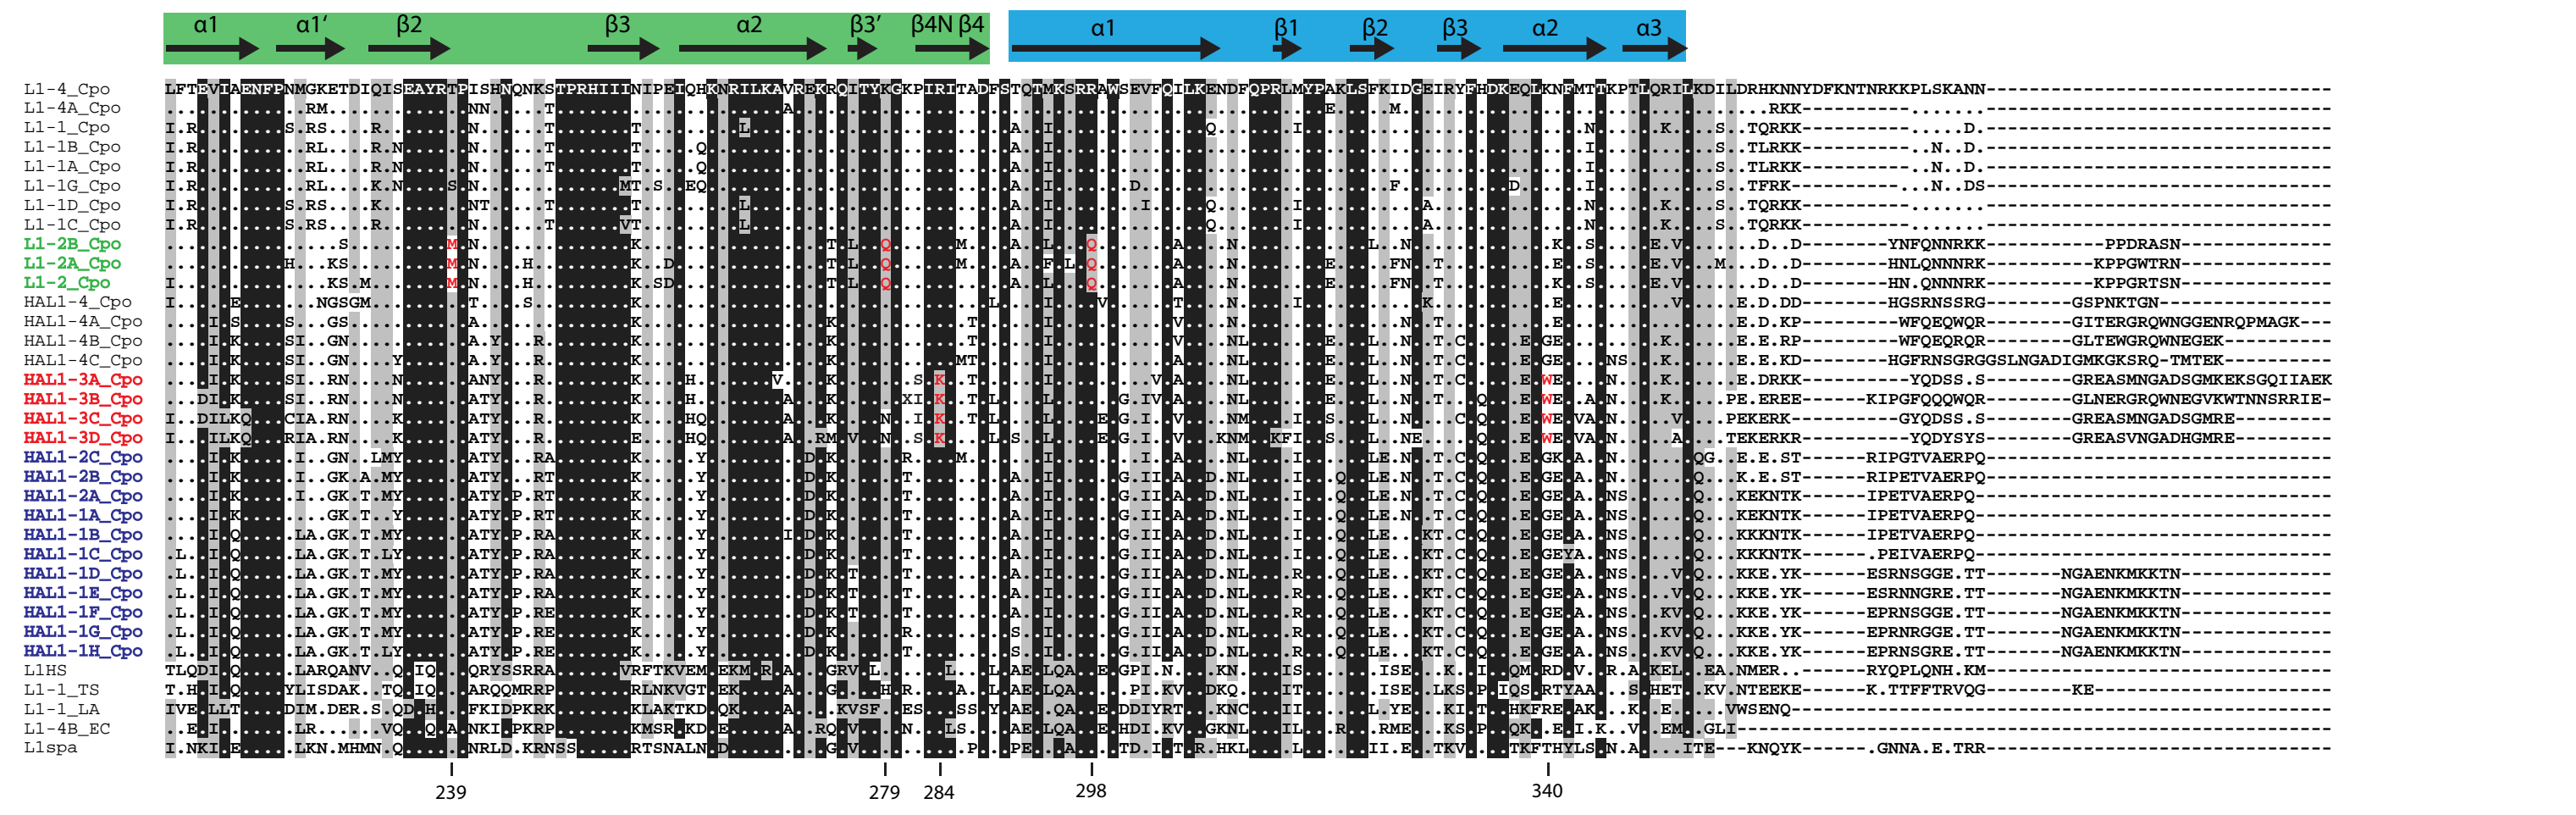

**Figure S2: Alignment of the guinea pig HAL1 ORF1p and L1 ORF1p.** L1 elements from other species include L1HS (human), L1-1\_TS (*Tarsius syrichta*), L1-1\_LA (elephant), L1-4B\_EC (horse) and L1spa (mouse, AAC53541.1). The coiled-coil (CC) domain region (yellow box, above) is depicted according to Januszyk et al. (2007), the noncanonical RNA-recognition-motifs (RRMs) (green box) and the C-terminal domain (CTD) (blue box) according to Khazina and Weichenrieder (2009). The amino acids (M239, Q279, K284, Q298 and W340), which potentially account for the low copy number of HAL1-3\_Cpo sub-lineage or extinction of L1-2\_Cpo lineage, are marked in red color. The amino acid positions are numbered (bottom) according to the sequence of mouse retrotransposon L1spa. Element names of HAL1-1\_Cpo sub-lineage, HAL1-3\_Cpo sub-lineage and L1-2\_Cpo lineage in the lower panel are distinguished by colors. The regions of HAL1-1A\_Cpo and HAL1B\_Cpo used in the Ka/Ks calculation are boxed in red.
