# Supplementary material
Source: PubMed Central journal article supplement (PMC2923044)
Supplement: NIHMS217382-supplement-03.pdf [file NIHMS217382-supplement-03.pdf]

Figure S3

**A**

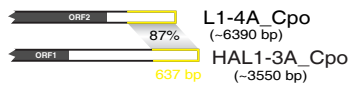

**B**

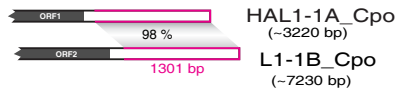

**C**

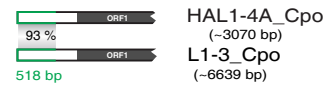

**D**

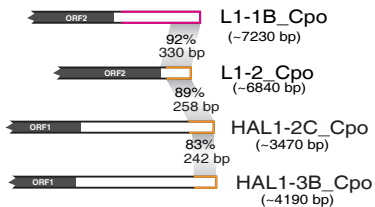

**E**

|                                                               |             |
|---------------------------------------------------------------|-------------|
| CATACATAAAAGATATGGACAGCTATTTCGAAGAGAACGAGAGACATTATGGCAGCCATT  | HAL1-3A_Cpo |
| CATAAATTGAAGATATGGATAAAGTGCATGTATGTTTAAGTGTATAGGATTGATAACCATA | HAL1-2C_Cpo |
| AAAGTGCTCTAAAGGATATAAAGTGCATGTATGTTTAAGTGTATAGGATTGATAACCATA  | L1-2_Cpo    |
| AAAGTGCTCAAAAAGGAAAAGCAACTGGGATAGGGAAAGGAAAAAGGAAGAAAGGAA     | L1-2B_Cpo   |

**Figure S3:** Sequence similarity between the swapping regions (**A-D**) and the sequence alignments around the junction points in 2 paired elements (**E**): *HALI-3A\_Cpo* and *HALI-2C\_Cpo*, *L1-2\_Cpo* and *L1-2B\_Cpo*. The swapped portions are in orange color.
